# Supplementary material
Source: HighWire-hosted journal article supplement (https://le.uwpress.org/content/suppl/2025/12/12/le.102.2.110824-0105R1)
Supplement: LE-102-2-GarciaAlvarez-appA.pdf [file LE-102-2-GarciaAlvarez-appA.pdf]

*Land Economics* 102 (2), May 2026

“Economic Benefits of Nature-Based Solutions for Climate Risk: A Meta-analysis”

by Guillermo García Álvarez, Willem J. W. Botzen, Max Tesselaar, Jeroen Aerts, Andrea Staccione, Jaroslav Mysiak, and Marija Bockarjova

## **APPENDIX A: Table of papers included in the meta-analysis**

| <b>Study ID</b> | <b>Author</b>                                     | <b>Year of publication</b> | <b>Title</b>                                                                                                                                           | <b>Sample size</b> |
|-----------------|---------------------------------------------------|----------------------------|--------------------------------------------------------------------------------------------------------------------------------------------------------|--------------------|
| 1               | Robinson et al.                                   | 2022                       | Understanding the determinants of biodiversity non-use values in the context of climate change: Stated preferences for the Hawaiian coral reef         | 1,369              |
| 2               | Netusil et al.                                    | 2022                       | Valuing the public benefits of green roofs                                                                                                             | 6,172              |
| 3               | Ando et al.                                       | 2020                       | Willingness-to-volunteer and stability of preferences between cities: Estimating the benefits of stormwater management                                 | 685                |
| 4               | Acharya R.P., Maraseni T.N., Cockfield G.         | 2021                       | Estimating the willingness to pay for regulating and cultural ecosystem services from forested Siwalik landscapes: perspectives of disaggregated users | 241                |
| 5               | Torres et al.                                     | 2017                       | Framing Decisions in Uncertain Scenarios: An Analysis of Tourist Preferences in the Face of Global Warming                                             | 407                |
| 6               | Chau and Chung                                    | 2010                       | A choice experiment to estimate the effect of green experience on preferences and willingness-to-pay for green building attributes                     | 480                |
| 7               | Koetse, Verhoef, Brander                          | 2017                       | A generic marginal value function for natural areas                                                                                                    | 1360               |
| 8               | Collins, Schaafsma, Hudson                        | 2017                       | The value of green walls to urban biodiversity                                                                                                         | 127                |
| 9               | Hampson et al.                                    | 2017                       | River Water Quality: Who Cares, How Much and Why?                                                                                                      | 200                |
| 10              | Hagedoorn L.C., Koetse M.J., van Beukering P.J.H. | 2021                       | Estimating Benefits of Nature-based Solutions: Diverging Values From Choice Experiments With Time or Money Payments                                    | 480                |
| 11              | Acong                                             | 2016                       | Measuring Households' Willingness to Pay for Water Quality Restoration of a Natural Urban Lake in the Philippines                                      | 341                |
| 12              | Che, Yang and Jiang                               | 2012                       | Assessing Local Communities' Willingness to Pay for River Network Protection: A Contingent Valuation Study of Shanghai, China                          | 531                |
| 13              | Chen and Jim                                      | 2011                       | Contingent valuation of ecotourism development in country parks in the urban shadow                                                                    | 613                |
| 14              | Chen, Aertsen, Liekens, Broekx and De Nocker      | 2014                       | What are we missing? Economic value of an urban forest in Ghana                                                                                        | 300                |

|    |                                            |      |                                                                                                                                                    |             |
|----|--------------------------------------------|------|----------------------------------------------------------------------------------------------------------------------------------------------------|-------------|
| 15 | Chui and Ngai                              | 2016 | Willingness to pay for sustainable drainage systems in a highly urbanised city: a contingent valuation study in Hong Kong                          | 600         |
| 16 | Dare, Ayinde and Shittu                    | 2015 | Urban trees forest management in Abeokuta Metropolis, Ogun State, Nigeria                                                                          | 670         |
| 17 | Dumenu                                     | 2013 | What are we missing? Economic value of an urban forest in Ghana                                                                                    | 200         |
| 18 | Giergiczny and Kronenberg                  | 2014 | From Valuation to Governance: Using Choice Experiment to Value Street Trees                                                                        | 351         |
| 19 | Sarvilinna, Lehtoranta and Hjerppe         | 2013 | Is Urban Stream Restoration Worth It?                                                                                                              | 228         |
| 20 | Kim, Ahn and Kim                           | 2016 | Metropolitan Residents' Preferences and Willingness to Pay for a Life Zone Forest for Mitigating Heat Island Effects during Summer Season in Korea | 448         |
| 21 | Kim, Kim and Doh                           | 2015 | Metropolitan Residents' Preferences and Willingness to Pay for a Life Zone Forest for Mitigating Heat Island Effects during Summer Season in Korea | 984         |
| 22 | Lantz, Boxall, Kennedy and Wilson          | 2013 | The valuation of wetland conservation in an urban/peri urban watershed                                                                             | 1407 / 1088 |
| 23 | Latinopoulos, Mallios and Latinopoulos     | 2016 | Valuing the benefits of an urban park project: A contingent valuation study in Thessaloniki, Greece                                                | 600         |
| 27 | Lo and Jim                                 | 2010 | Willingness of Residents to Pay and Motives for Conservation of Urban Green Spaces in the Compact City of Hong Kong                                | 495         |
| 28 | Machado, Silva, Dupas, Mattedi and Vergara | 2014 | Economic assessment of urban watersheds: developing mechanisms for environmental protection of the Feijão river, São Carlos                        | 280         |
| 29 | Majumdar, Deng, Zhang and Pierskalla       | 2011 | Using contingent valuation to estimate the willingness of tourists to pay for urban forests: A study in Savannah, Georgia                          | 640         |
| 30 | Mell, Henneberry, Hehl-Lange and Keskin    | 2013 | Promoting urban greening: Valuing the development of green infrastructure investments in the urban core of Manchester, UK                          | 512         |
| 31 | Mueller                                    | 2013 | Estimating willingness to pay for watershed restoration in Flagstaff, Arizona using dichotomous-choice contingent valuation                        | 120         |

|    |                                                                                        |      |                                                                                                                                                       |       |
|----|----------------------------------------------------------------------------------------|------|-------------------------------------------------------------------------------------------------------------------------------------------------------|-------|
| 32 | Shamsudin, Ghani, Radam, Kaffashi, Rahim and Hassin                                    | 2012 | Willingness to Pay for Watershed Conservation at Hulu Langat, Selangor                                                                                | 500   |
| 33 | Tao, Yan and Zhan                                                                      | 2012 | Economic Valuation of Forest Ecosystem Services in Heshui Watershed using Contingent Valuation Method                                                 | 170   |
| 34 | Tu, Abildtrup and Garcia                                                               | 2016 | Preferences for urban green spaces and peri-urban forests: An analysis of stated residential choices                                                  | 180   |
| 37 | Londoño Cadavid C., Ando A.W.                                                          | 2013 | Valuing preferences over stormwater management outcomes including improved hydrologic function                                                        | 131   |
| 38 | Stefanski S.F., Shimshack J.P.                                                         | 2016 | Valuing Marine Biodiversity in the Gulf of Mexico: Evidence from the Proposed Boundary Expansion of the Flower Garden Banks National Marine Sanctuary | 1526  |
| 39 | Dallimer M., Martin-Ortega J., Rendon O., Afionis S., Bark R., Gordon I.J., Paavola J. | 2019 | Urban-rural divides in preferences for wetland conservation in Malaysia                                                                               | 403   |
| 40 | Aguilar F.X., Obeng E.A., Cai Z.                                                       | 2018 | Water quality improvements elicit consistent willingness-to-pay for the enhancement of forested watershed ecosystem services                          | 1,002 |
| 41 | Petrolia D.R., Interis M.G., Hwang J.                                                  | 2014 | America's wetland? A national survey of willingness to pay for restoration of Louisiana's coastal wetlands                                            | 3,464 |
| 42 | Omori Y.                                                                               | 2021 | Preference Heterogeneity of Coastal Gray, Green, and Hybrid Infrastructure against Sea-Level Rise: A Choice Experiment Application in Japan           | 840   |
| 45 | Viti et al.                                                                            | 2023 | Holistic valuation of Nature-Based Solutions accounting for human perceptions and nature benefits                                                     | 607   |
| 46 | Herivaux & Le Coent                                                                    | 2020 | Preferences for nature-based solutions aiming at reducing flood risks. Results of a Discrete Choice Experiment in the Lez catchment (France)          | 400   |
| 47 | Ureta                                                                                  | 2021 | Valuing stakeholder preferences for environmental benefits of stormwater ponds: Evidence from choice experiment                                       | 1159  |
| 48 | Uggeldahl et al.                                                                       | 2019 | Public preferences for co-benefits of riparian buffer strips in Denmark: An economic valuation study                                                  | 1471  |

|           |                                                                            |      |                                                                                                                                         |      |
|-----------|----------------------------------------------------------------------------|------|-----------------------------------------------------------------------------------------------------------------------------------------|------|
| <b>49</b> | Shoyama et al.                                                             | 2013 | Public preferences for biodiversity conservation and climate-change mitigation: A choice experiment using ecosystem services indicators | 3848 |
| <b>50</b> | Bockarjova et al.                                                          | 2023 | Citizens' preferences and valuation of urban nature: Insights from two choice experiments                                               | 1973 |
| <b>51</b> | Turkelboom et al.                                                          | 2021 | How does a nature-based solution for flood control compare to a technical solution? Case study evidence from Belgium                    | 332  |
| <b>52</b> | Owuor, et al.                                                              | 2019 | Valuing mangrove biodiversity and ecosystem services: A deliberative choice experiment in Mida Creek, Kenya                             | 300  |
| <b>53</b> | Lara-Pulido et al.                                                         | 2021 | A Business Case for Marine Protected Areas: Economic Valuation of the Reef Attributes of Cozumel Island                                 | 740  |
| <b>54</b> | Duijndam et al.                                                            | 2020 | Valuing a Caribbean coastal lagoon using the choice experiment method: The case of the Simpson Bay Lagoon, Saint Martin                 | 219  |
| <b>55</b> | Maximilian Nawrath, Kathinka Fürst, Michael Hutchins, Isabel Seifert-Dähnn | 2023 | Milder, wilder, drier: Understanding preferences for urban nature-based solutions in China                                              | 517  |
| <b>56</b> | Robinson et al.                                                            | 2023 | The Intangible Economic Value of Nature Landscape and Biodiversity Restoration                                                          | 1530 |
| <b>57</b> | Jarvie et al.                                                              | 2012 | Valuing multiple benefits, and the public perception of SUDS ponds                                                                      | 238  |
| <b>58</b> | Tran et al.                                                                | 2017 | Atlanta households' willingness to increase urban forests to mitigate climate change                                                    | 470  |
| <b>59</b> | Zhi Ying                                                                   | 2020 | Beijing resident's preferences of ecosystem services of urban forests                                                                   | 560  |
| <b>60</b> | Davies et al.                                                              | 2023 | Willingness-to-pay for urban ecosystem services provision under objective and subjective uncertainty                                    | 362  |
| <b>61</b> | Vechiato & Tempesta                                                        | 2023 | Valuing the benefits of an afforestation project in a peri-urban area with choice experiments                                           | 830  |
