# Supplementary material
Source: HighWire-hosted journal article supplement (https://le.uwpress.org/content/suppl/2025/12/12/le.102.2.110824-0105R1)
Supplement: LE-102-2-GarciaAlvarez-appC.pdf [file LE-102-2-GarciaAlvarez-appC.pdf]

### APPENDIX C: Results of OLS models

|                                  | (1)                | (2)                 | (3)                 | (4)                 | (5)                  |
|----------------------------------|--------------------|---------------------|---------------------|---------------------|----------------------|
|                                  | log WTP            | log WTP             | log WTP             | log WTP             | log WTP              |
| Area (ln)                        | -.809***<br>(.103) | -.72***<br>(.114)   | -.622***<br>(.133)  | -.602***<br>(.117)  | -.617***<br>(.076)   |
| GDP (ln)                         | .176<br>(.512)     |                     |                     | -.71<br>(.486)      | -.242<br>(.31)       |
| Density (ln)                     | -.079<br>(.289)    | -.079<br>(.285)     | -.27<br>(.32)       | -.339<br>(.24)      | -.187<br>(.215)      |
| Africa                           |                    | .467<br>(1.913)     | .807<br>(1.927)     | -.107<br>(1.174)    |                      |
| Europe                           |                    | 1.728<br>(1.088)    | 2.285*<br>(1.145)   | 1.665<br>(1.103)    |                      |
| Asia                             |                    | 2.472<br>(1.981)    | 2.197<br>(1.462)    | -.331<br>(1.505)    |                      |
| CV                               |                    | -2.384**<br>(1.076) | -2.485***<br>(.848) | -2.676***<br>(.818) | -3.281***<br>(.818)  |
| Urban dummy                      |                    |                     | 3.395**<br>(1.34)   |                     |                      |
| Coral reefs                      |                    |                     | 2.216<br>(1.701)    |                     | .523<br>(1.094)      |
| Mangroves                        |                    |                     | 2.608<br>(1.691)    |                     | 2.318*<br>(1.226)    |
| Lakes, ponds, river              |                    |                     | 1.635<br>(1.569)    |                     | -.995<br>(.903)      |
| Wetlands                         |                    |                     | 1.276<br>(1.397)    |                     | -.171<br>(1.048)     |
| Forest                           |                    |                     | .386<br>(1.561)     |                     | -.764<br>(.859)      |
| Local climate regulation         |                    |                     |                     | 4.731***<br>(1.451) | 5.412***<br>(.995)   |
| Air quality regulation           |                    |                     |                     | -.434<br>(.864)     | -.073<br>(.745)      |
| Carbon storage                   |                    |                     |                     | -2.48**<br>(1.082)  | -3.147***<br>(1.089) |
| Habitats for species             |                    |                     |                     | -.591<br>(.678)     | -.25<br>(.68)        |
| Maintenance of genetic diversity |                    |                     |                     | 1.127<br>(.755)     | .927<br>(.686)       |
| Recreation                       |                    |                     |                     | .895<br>(.714)      | .847<br>(.563)       |
| Aesthetic appreciation           |                    |                     |                     | 1.719***<br>(.514)  | 1.693***<br>(.523)   |
| Tourism                          |                    |                     |                     | -1.755*<br>(.88)    | -1.488<br>(.921)     |
| Flood risk                       |                    |                     |                     | 2.08**<br>(.996)    | 1.966***<br>(.678)   |
| Urban – street level             |                    |                     |                     |                     | 3.786***<br>(1.07)   |
| Urban - building                 |                    |                     |                     |                     | -2.58*<br>(1.534)    |
| Reforestation                    |                    |                     |                     |                     | 2.484<br>(1.8)       |

|              |                     |                     |                      |                      |                     |
|--------------|---------------------|---------------------|----------------------|----------------------|---------------------|
| Restoration  |                     |                     |                      |                      | .027<br>(.749)      |
| Agricultural |                     |                     |                      |                      | 4.273***<br>(1.336) |
| _cons        | 13.758**<br>(6.444) | 14.012***<br>(2.01) | 11.776***<br>(2.591) | 19.249***<br>(4.899) | 13.68***<br>(3.914) |
| Observations | 219                 | 219                 | 219                  | 219                  | 219                 |
| R-squared    | .441                | .517                | .537                 | .669                 | .715                |

---

*Standard errors are in parentheses*

\*\*\*  $p < .01$ , \*\*  $p < .05$ , \*  $p < .1$
