# Supplementary material
Source: HighWire-hosted journal article supplement (https://le.uwpress.org/content/suppl/2025/12/12/le.102.2.110824-0105R1)
Supplement: LE-102-2-GarciaAlvarez-appE.pdf [file LE-102-2-GarciaAlvarez-appE.pdf]

## **APPENDIX E: Value transfer function without accounting for previous land use**

|                                              |                                                                                                                                   |
|----------------------------------------------|-----------------------------------------------------------------------------------------------------------------------------------|
| <b>Project</b>                               | Essen's transition from gray to green                                                                                             |
| <b>Continent</b>                             | Europe                                                                                                                            |
| <b>Risk being addressed</b>                  | Flooding                                                                                                                          |
| <b>Area (ha)</b>                             | 230                                                                                                                               |
| <b>Population density</b>                    | 2,715                                                                                                                             |
| <b>GDP per capita (USD 2022)</b>             | 50,070                                                                                                                            |
| <b>Type of NbS</b>                           | Park                                                                                                                              |
| <b>Co-benefits provided</b>                  | Local climate regulation, air quality, recreation, habitat for species, carbon sequestration, flood risk, aesthetic appreciation. |
| <b>Value per hectare per year (2022 USD)</b> | €159,894                                                                                                                          |
| <b>Total value per year (2022 USD)</b>       | €36,775,620                                                                                                                       |
